# Supplementary material for: Deletion of phosphatidylserine flippase β-subunit Tmem30a in satellite cells leads to delayed skeletal muscle regeneration
Source: PubMed Central journal article supplement — Zool Res. 2021 Sep 18;42(5):650–9. doi: 10.24272/j.issn.2095-8137.2021.195 (PMC8455468; doi:10.24272/j.issn.2095-8137.2021.195), 2021-09-18
Supplement: zr-42-5-650-S1.pdf [file zr-42-5-650-S1.pdf]

## Supplementary Materials Supplementary Figures

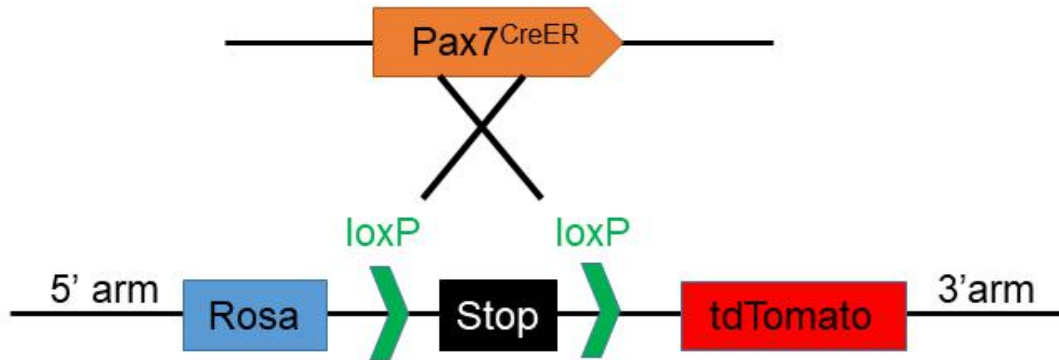

Supplementary Figure S1. Generation of tdTomato reporter mice.

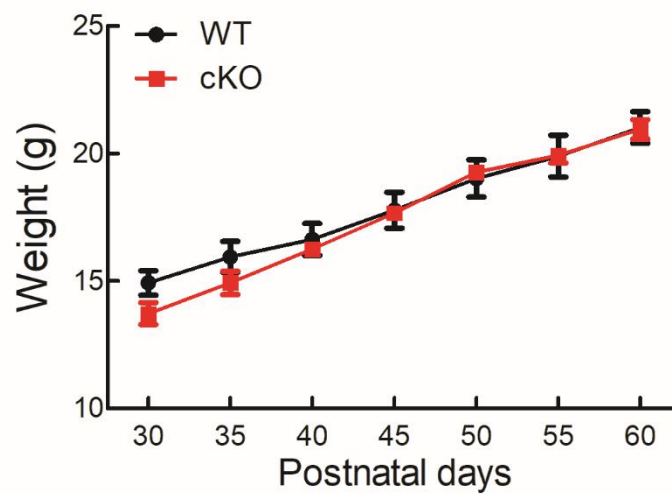

Supplementary Figure S2. No difference was observed in body weights between WT and cKO mice from P30 to P60.  $n=3$  for each time point for both WT and cKO mice.

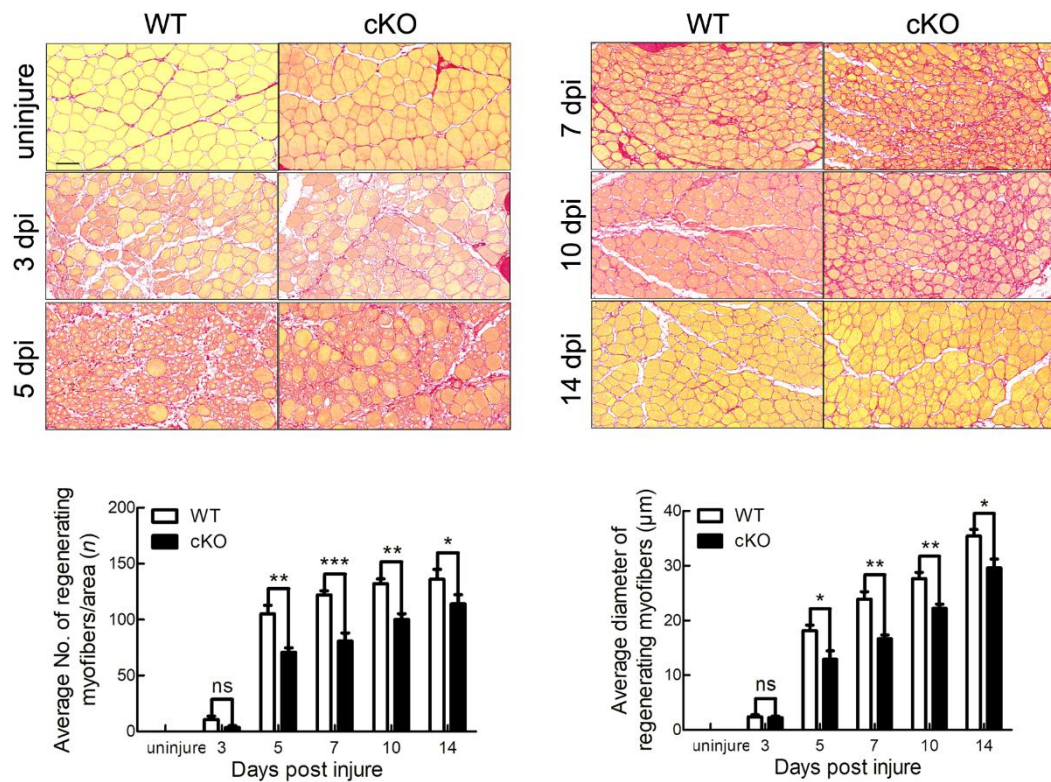

### Supplementary Figure S3. Representative images of Sirius Red-stained TA

**muscles from WT and cKO mice.** (A) Sirius Red-stained TA muscles from uninjured WT and cKO mice and WT and cKO mice at 3, 5, 7, 10, and 14 dpi. Scale bar is 50  $\mu\text{m}$ . (B) Average number of regenerating myofibers per field in uninjured mice and in mice at 3, 5, 7, 10, and 14 dpi. (C) Average diameter of regenerating myofibers in uninjured mice and in mice at 3, 5, 7, 10, and 14 dpi. Data are mean  $\pm$  SEM.  $n=3$  in each group. Significance was calculated by two-tailed Student's  $t$ -test.

\* $P < 0.05$ , \*\* $P < 0.01$ , \*\*\* $P < 0.001$ .
